# Supplementary material
Source: publisher figshare collection journal article supplement (https://acs.figshare.com/ndownloader/files/3886615)
Supplement: Supplementary file 1 [file 3886615]

 
data_DADDSFORMI
 
_audit_creation_method            SHELXL-97 
_chemical_name_systematic 
; 
 ? 
; 
_chemical_name_common             'Acedapsone'
_chemical_melting_point           566 
_chemical_formula_moiety          'C16 H16 N2 O4 S' 
_chemical_formula_sum 
 'C16 H16 N2 O4 S' 
_chemical_formula_weight          332.37 
 
loop_ 
 _atom_type_symbol 
 _atom_type_description 
 _atom_type_scat_dispersion_real 
 _atom_type_scat_dispersion_imag 
 _atom_type_scat_source 
 'C'  'C'   0.0033   0.0016 
 'International Tables Vol C Tables 4.2.6.8 and 6.1.1.4' 
 'H'  'H'   0.0000   0.0000 
 'International Tables Vol C Tables 4.2.6.8 and 6.1.1.4' 
 'N'  'N'   0.0061   0.0033 
 'International Tables Vol C Tables 4.2.6.8 and 6.1.1.4' 
 'O'  'O'   0.0106   0.0060 
 'International Tables Vol C Tables 4.2.6.8 and 6.1.1.4' 
 'S'  'S'   0.1246   0.1234 
 'International Tables Vol C Tables 4.2.6.8 and 6.1.1.4' 
 
_symmetry_cell_setting            Monoclinic 
_symmetry_space_group_name_H-M    P21/n 
 
loop_ 
 _symmetry_equiv_pos_as_xyz 
 'x, y, z' 
 '-x+1/2, y+1/2, -z+1/2' 
 '-x, -y, -z' 
 'x-1/2, -y-1/2, z-1/2' 
 
_cell_length_a                    8.2728(8) 
_cell_length_b                    7.8636(8) 
_cell_length_c                    23.762(2) 
_cell_angle_alpha                 90.00 
_cell_angle_beta                  96.295(2) 
_cell_angle_gamma                 90.00 
_cell_volume                      1536.5(3) 
_cell_formula_units_Z             4 
_cell_measurement_temperature     298(2) 
_cell_measurement_reflns_used     2656
_cell_measurement_theta_min       2.53
_cell_measurement_theta_max       25.46 
 
_exptl_crystal_description        block 
_exptl_crystal_colour             colorless 
_exptl_crystal_size_max           0.22 
_exptl_crystal_size_mid           0.20
_exptl_crystal_size_min           0.20 
_exptl_crystal_density_meas       ? 
_exptl_crystal_density_diffrn     1.437 
_exptl_crystal_density_method     ?
_exptl_crystal_F_000              696 
_exptl_absorpt_coefficient_mu     0.233 
_exptl_absorpt_correction_type    'none' 
_exptl_absorpt_correction_T_min   ? 
_exptl_absorpt_correction_T_max   ? 
_exptl_absorpt_process_details    ? 
 
_exptl_special_details 
; 
 ? 
; 
 
_diffrn_ambient_temperature       298(2) 
_diffrn_radiation_wavelength      0.71073 
_diffrn_radiation_type            MoK\a 
_diffrn_radiation_source          'fine-focus sealed tube' 
_diffrn_radiation_monochromator   graphite 
_diffrn_measurement_device_type   ? 
_diffrn_measurement_method        ? 
_diffrn_detector_area_resol_mean  ? 
_diffrn_standards_number          ? 
_diffrn_standards_interval_count  ? 
_diffrn_standards_interval_time   ? 
_diffrn_standards_decay_%         ? 
_diffrn_reflns_number             15847 
_diffrn_reflns_av_R_equivalents   0.0433 
_diffrn_reflns_av_sigmaI/netI     0.0407 
_diffrn_reflns_limit_h_min        -10 
_diffrn_reflns_limit_h_max        10 
_diffrn_reflns_limit_k_min        -9 
_diffrn_reflns_limit_k_max        9 
_diffrn_reflns_limit_l_min        -29 
_diffrn_reflns_limit_l_max        29 
_diffrn_reflns_theta_min          1.72 
_diffrn_reflns_theta_max          26.37 
_reflns_number_total              3139 
_reflns_number_gt                 2308 
_reflns_threshold_expression      >2sigma(I) 
 
_computing_data_collection        ? 
_computing_cell_refinement        ? 
_computing_data_reduction         ? 
_computing_structure_solution     'SHELXS-97 (Sheldrick, 1990)' 
_computing_structure_refinement   'SHELXL-97 (Sheldrick, 1997)' 
_computing_molecular_graphics     ? 
_computing_publication_material   ? 
 
_refine_special_details 
; 
 Refinement of F^2^ against ALL reflections.  The weighted R-factor wR and 
 goodness of fit S are based on F^2^, conventional R-factors R are based 
 on F, with F set to zero for negative F^2^. The threshold expression of 
 F^2^ > 2sigma(F^2^) is used only for calculating R-factors(gt) etc. and is 
 not relevant to the choice of reflections for refinement.  R-factors based 
 on F^2^ are statistically about twice as large as those based on F, and R- 
 factors based on ALL data will be even larger. 
; 
 
_refine_ls_structure_factor_coef  Fsqd  
_refine_ls_matrix_type            full 
_refine_ls_weighting_scheme       calc  
_refine_ls_weighting_details 
 'calc w=1/[\s^2^(Fo^2^)+(0.0682P)^2^+0.2530P] where P=(Fo^2^+2Fc^2^)/3' 
_atom_sites_solution_primary      direct 
_atom_sites_solution_secondary    difmap 
_atom_sites_solution_hydrogens    geom 
_refine_ls_hydrogen_treatment     mixed 
_refine_ls_extinction_method      none 
_refine_ls_extinction_coef        ? 
_refine_ls_number_reflns          3139 
_refine_ls_number_parameters      218 
_refine_ls_number_restraints      0 
_refine_ls_R_factor_all           0.0659 
_refine_ls_R_factor_gt            0.0450 
_refine_ls_wR_factor_ref          0.1250 
_refine_ls_wR_factor_gt           0.1140 
_refine_ls_goodness_of_fit_ref    1.030 
_refine_ls_restrained_S_all       1.030 
_refine_ls_shift/su_max           0.000 
_refine_ls_shift/su_mean          0.000 
 
loop_ 
 _atom_site_label 
 _atom_site_type_symbol 
 _atom_site_fract_x 
 _atom_site_fract_y 
 _atom_site_fract_z 
 _atom_site_U_iso_or_equiv 
 _atom_site_adp_type 
 _atom_site_occupancy 
 _atom_site_symmetry_multiplicity 
 _atom_site_calc_flag 
 _atom_site_refinement_flags 
 _atom_site_disorder_assembly 
 _atom_site_disorder_group 
S1 S 0.09374(6) 0.93756(7) 0.14618(2) 0.03947(19) Uani 1 1 d . . . 
O4 O 0.7138(2) 0.9577(2) 0.35898(6) 0.0570(5) Uani 1 1 d . . . 
C1 C 0.5985(3) 0.9525(3) 0.24095(8) 0.0361(5) Uani 1 1 d . . . 
C4 C 0.2889(3) 0.9483(3) 0.18465(8) 0.0348(5) Uani 1 1 d . . . 
N2 N 0.2506(2) 0.4279(2) -0.02234(7) 0.0406(5) Uani 1 1 d . . . 
C10 C 0.2041(2) 0.5458(3) 0.01742(8) 0.0341(5) Uani 1 1 d . . . 
O1 O 0.0575(2) 1.0990(2) 0.11965(7) 0.0543(5) Uani 1 1 d . . . 
O2 O -0.01592(18) 0.8712(2) 0.18376(6) 0.0522(4) Uani 1 1 d . . . 
N1 N 0.7598(2) 0.9577(3) 0.26715(8) 0.0430(5) Uani 1 1 d . . . 
C9 C 0.1602(2) 0.4952(3) 0.06966(8) 0.0362(5) Uani 1 1 d . . . 
H9 H 0.1585 0.3803 0.0789 0.043 Uiso 1 1 calc R . . 
C3 C 0.3198(3) 0.8659(3) 0.23613(8) 0.0387(5) Uani 1 1 d . . . 
H3 H 0.2368 0.8080 0.2514 0.046 Uiso 1 1 calc R . . 
O3 O 0.3674(2) 0.2275(2) 0.03738(7) 0.0656(5) Uani 1 1 d . . . 
C8 C 0.1194(2) 0.6151(3) 0.10776(8) 0.0363(5) Uani 1 1 d . . . 
H8 H 0.0912 0.5814 0.1429 0.044 Uiso 1 1 calc R . . 
C2 C 0.4744(3) 0.8699(3) 0.26473(9) 0.0389(5) Uani 1 1 d . . . 
H2 H 0.4952 0.8173 0.2998 0.047 Uiso 1 1 calc R . . 
C15 C 0.8086(3) 0.9651(3) 0.32351(9) 0.0392(5) Uani 1 1 d . . . 
C7 C 0.1203(2) 0.7853(3) 0.09391(8) 0.0338(5) Uani 1 1 d . . . 
C13 C 0.3259(3) 0.2764(3) -0.01051(9) 0.0429(5) Uani 1 1 d . . . 
C5 C 0.4126(3) 1.0294(3) 0.16030(9) 0.0406(5) Uani 1 1 d . . . 
H5 H 0.3917 1.0824 0.1253 0.049 Uiso 1 1 calc R . . 
C12 C 0.1565(3) 0.8381(3) 0.04075(9) 0.0440(5) Uani 1 1 d . . . 
H12 H 0.1534 0.9527 0.0310 0.053 Uiso 1 1 calc R . . 
C16 C 0.9873(3) 0.9874(4) 0.33874(10) 0.0538(6) Uani 1 1 d . . . 
H16A H 1.0125 1.1064 0.3417 0.081 Uiso 1 1 calc R . . 
H16B H 1.0447 0.9372 0.3099 0.081 Uiso 1 1 calc R . . 
H16C H 1.0196 0.9328 0.3743 0.081 Uiso 1 1 calc R . . 
C6 C 0.5663(3) 1.0305(3) 0.18850(9) 0.0416(5) Uani 1 1 d . . . 
H6 H 0.6500 1.0841 0.1723 0.050 Uiso 1 1 calc R . . 
C11 C 0.1969(3) 0.7163(3) 0.00277(9) 0.0446(6) Uani 1 1 d . . . 
H11 H 0.2197 0.7493 -0.0331 0.054 Uiso 1 1 calc R . . 
C14 C 0.3560(3) 0.1727(3) -0.06091(10) 0.0616(7) Uani 1 1 d . . . 
H14A H 0.4685 0.1810 -0.0670 0.092 Uiso 1 1 calc R . . 
H14B H 0.2896 0.2144 -0.0937 0.092 Uiso 1 1 calc R . . 
H14C H 0.3291 0.0561 -0.0545 0.092 Uiso 1 1 calc R . . 
H2A H 0.238(3) 0.467(3) -0.0588(11) 0.054(7) Uiso 1 1 d . . . 
H1A H 0.829(3) 0.960(3) 0.2426(11) 0.060(8) Uiso 1 1 d . . . 
 
loop_ 
 _atom_site_aniso_label 
 _atom_site_aniso_U_11 
 _atom_site_aniso_U_22 
 _atom_site_aniso_U_33 
 _atom_site_aniso_U_23 
 _atom_site_aniso_U_13 
 _atom_site_aniso_U_12 
S1 0.0376(3) 0.0473(3) 0.0336(3) -0.0077(2) 0.0042(2) 0.0061(2) 
O4 0.0459(10) 0.0968(14) 0.0287(8) -0.0070(8) 0.0060(7) -0.0067(9) 
C1 0.0392(12) 0.0419(12) 0.0275(10) -0.0064(9) 0.0056(9) -0.0007(9) 
C4 0.0387(11) 0.0373(11) 0.0285(10) -0.0073(9) 0.0041(9) 0.0009(9) 
N2 0.0497(11) 0.0466(11) 0.0248(9) -0.0020(8) 0.0004(8) 0.0060(9) 
C10 0.0332(11) 0.0417(12) 0.0263(10) -0.0032(9) -0.0020(8) 0.0004(9) 
O1 0.0618(11) 0.0478(10) 0.0516(10) -0.0042(8) -0.0015(8) 0.0186(8) 
O2 0.0402(9) 0.0760(12) 0.0425(9) -0.0126(8) 0.0142(7) -0.0008(8) 
N1 0.0356(10) 0.0640(13) 0.0302(10) -0.0033(9) 0.0073(8) -0.0011(9) 
C9 0.0356(11) 0.0404(12) 0.0324(11) 0.0016(9) 0.0028(9) -0.0015(9) 
C3 0.0425(12) 0.0420(12) 0.0327(11) -0.0023(9) 0.0093(9) -0.0053(10) 
O3 0.0937(14) 0.0656(12) 0.0379(9) 0.0109(8) 0.0095(9) 0.0299(10) 
C8 0.0340(11) 0.0471(13) 0.0279(10) 0.0023(9) 0.0042(8) -0.0011(9) 
C2 0.0456(13) 0.0449(13) 0.0264(10) 0.0005(9) 0.0050(9) -0.0007(10) 
C15 0.0395(12) 0.0447(13) 0.0332(11) -0.0019(9) 0.0024(10) 0.0025(9) 
C7 0.0307(10) 0.0426(12) 0.0275(10) -0.0045(9) 0.0003(8) 0.0008(9) 
C13 0.0492(13) 0.0436(13) 0.0367(12) -0.0010(10) 0.0080(10) 0.0038(10) 
C5 0.0485(13) 0.0454(13) 0.0274(11) 0.0005(9) 0.0017(10) -0.0019(10) 
C12 0.0599(15) 0.0383(12) 0.0337(12) 0.0017(9) 0.0055(10) 0.0013(10) 
C16 0.0399(13) 0.0708(17) 0.0499(14) -0.0009(12) 0.0009(11) -0.0001(12) 
C6 0.0459(13) 0.0489(13) 0.0309(11) 0.0004(10) 0.0081(10) -0.0096(10) 
C11 0.0640(15) 0.0430(13) 0.0276(11) 0.0021(9) 0.0086(10) -0.0010(11) 
C14 0.0813(19) 0.0580(16) 0.0459(14) -0.0115(12) 0.0085(14) 0.0163(14) 
 
_geom_special_details 
; 
 All esds (except the esd in the dihedral angle between two l.s. planes) 
 are estimated using the full covariance matrix.  The cell esds are taken 
 into account individually in the estimation of esds in distances, angles 
 and torsion angles; correlations between esds in cell parameters are only 
 used when they are defined by crystal symmetry.  An approximate (isotropic) 
 treatment of cell esds is used for estimating esds involving l.s. planes. 
; 
 
loop_ 
 _geom_bond_atom_site_label_1 
 _geom_bond_atom_site_label_2 
 _geom_bond_distance 
 _geom_bond_site_symmetry_2 
 _geom_bond_publ_flag 
S1 O1 1.4342(17) . ? 
S1 O2 1.4390(16) . ? 
S1 C7 1.756(2) . ? 
S1 C4 1.768(2) . ? 
O4 C15 1.214(3) . ? 
C1 C2 1.387(3) . ? 
C1 C6 1.389(3) . ? 
C1 N1 1.410(3) . ? 
C4 C3 1.383(3) . ? 
C4 C5 1.385(3) . ? 
N2 C13 1.360(3) . ? 
N2 C10 1.407(3) . ? 
N2 H2A 0.92(2) . ? 
C10 C11 1.385(3) . ? 
C10 C9 1.389(3) . ? 
N1 C15 1.357(3) . ? 
N1 H1A 0.86(3) . ? 
C9 C8 1.375(3) . ? 
C9 H9 0.9300 . ? 
C3 C2 1.381(3) . ? 
C3 H3 0.9300 . ? 
O3 C13 1.215(3) . ? 
C8 C7 1.378(3) . ? 
C8 H8 0.9300 . ? 
C2 H2 0.9300 . ? 
C15 C16 1.494(3) . ? 
C7 C12 1.393(3) . ? 
C13 C14 1.492(3) . ? 
C5 C6 1.370(3) . ? 
C5 H5 0.9300 . ? 
C12 C11 1.382(3) . ? 
C12 H12 0.9300 . ? 
C16 H16A 0.9600 . ? 
C16 H16B 0.9600 . ? 
C16 H16C 0.9600 . ? 
C6 H6 0.9300 . ? 
C11 H11 0.9300 . ? 
C14 H14A 0.9600 . ? 
C14 H14B 0.9600 . ? 
C14 H14C 0.9600 . ? 
 
loop_ 
 _geom_angle_atom_site_label_1 
 _geom_angle_atom_site_label_2 
 _geom_angle_atom_site_label_3 
 _geom_angle 
 _geom_angle_site_symmetry_1 
 _geom_angle_site_symmetry_3 
 _geom_angle_publ_flag 
O1 S1 O2 118.58(10) . . ? 
O1 S1 C7 109.20(10) . . ? 
O2 S1 C7 109.13(10) . . ? 
O1 S1 C4 108.66(10) . . ? 
O2 S1 C4 107.38(10) . . ? 
C7 S1 C4 102.73(9) . . ? 
C2 C1 C6 119.7(2) . . ? 
C2 C1 N1 122.75(19) . . ? 
C6 C1 N1 117.57(19) . . ? 
C3 C4 C5 120.8(2) . . ? 
C3 C4 S1 120.30(16) . . ? 
C5 C4 S1 118.75(16) . . ? 
C13 N2 C10 126.25(18) . . ? 
C13 N2 H2A 119.6(15) . . ? 
C10 N2 H2A 113.8(15) . . ? 
C11 C10 C9 119.58(19) . . ? 
C11 C10 N2 118.44(18) . . ? 
C9 C10 N2 121.94(19) . . ? 
C15 N1 C1 126.97(19) . . ? 
C15 N1 H1A 121.5(18) . . ? 
C1 N1 H1A 111.5(17) . . ? 
C8 C9 C10 119.9(2) . . ? 
C8 C9 H9 120.0 . . ? 
C10 C9 H9 120.0 . . ? 
C2 C3 C4 119.7(2) . . ? 
C2 C3 H3 120.1 . . ? 
C4 C3 H3 120.1 . . ? 
C9 C8 C7 120.04(19) . . ? 
C9 C8 H8 120.0 . . ? 
C7 C8 H8 120.0 . . ? 
C3 C2 C1 119.82(19) . . ? 
C3 C2 H2 120.1 . . ? 
C1 C2 H2 120.1 . . ? 
O4 C15 N1 122.6(2) . . ? 
O4 C15 C16 122.3(2) . . ? 
N1 C15 C16 115.0(2) . . ? 
C8 C7 C12 120.88(19) . . ? 
C8 C7 S1 119.26(15) . . ? 
C12 C7 S1 119.60(16) . . ? 
O3 C13 N2 123.2(2) . . ? 
O3 C13 C14 121.6(2) . . ? 
N2 C13 C14 115.21(19) . . ? 
C6 C5 C4 119.1(2) . . ? 
C6 C5 H5 120.4 . . ? 
C4 C5 H5 120.4 . . ? 
C11 C12 C7 118.5(2) . . ? 
C11 C12 H12 120.8 . . ? 
C7 C12 H12 120.8 . . ? 
C15 C16 H16A 109.5 . . ? 
C15 C16 H16B 109.5 . . ? 
H16A C16 H16B 109.5 . . ? 
C15 C16 H16C 109.5 . . ? 
H16A C16 H16C 109.5 . . ? 
H16B C16 H16C 109.5 . . ? 
C5 C6 C1 120.8(2) . . ? 
C5 C6 H6 119.6 . . ? 
C1 C6 H6 119.6 . . ? 
C12 C11 C10 120.90(19) . . ? 
C12 C11 H11 119.5 . . ? 
C10 C11 H11 119.5 . . ? 
C13 C14 H14A 109.5 . . ? 
C13 C14 H14B 109.5 . . ? 
H14A C14 H14B 109.5 . . ? 
C13 C14 H14C 109.5 . . ? 
H14A C14 H14C 109.5 . . ? 
H14B C14 H14C 109.5 . . ? 
 
_diffrn_measured_fraction_theta_max    1.000 
_diffrn_reflns_theta_full              26.37 
_diffrn_measured_fraction_theta_full   1.000 
_refine_diff_density_max    0.410 
_refine_diff_density_min   -0.258 
_refine_diff_density_rms    0.054 
